# Supplementary material for: Veterans Affairs patient database (VAPD 2014–2017): building nationwide granular data for clinical discovery
Source: Springer Nature journal article supplement (doi:10.1186/s12874-019-0740-x), 2019-05-08
Supplement: MOESM1 [file 16709196]

## **ONLINE DATA SUPPLEMENT**

**Title:** Veterans Affairs patient database (VAPD): building nationwide granular data for clinical discovery

**Authors:** Xiao Qing Wang, MPH, Brenda M. Vincent, MS, Wyndy Wiitala, PhD, Kaitlyn A. Luginbill, MPH, Elizabeth M. Viglianti, MD, MPH, Hallie C. Prescott, MD, MSc, Theodore J. Iwashyna, MD, PhD

### **Table of Contents**

**Appendix A:** VAPD definitions for standardized nomenclature and data elements

**Appendix B:** Standard operating procedure for laboratory data extraction

**Appendix C:** Standard operating procedure for medications data extraction

**Appendix D:** Antibiotic drug classifications reference

## Appendix A: VAPD definitions for standardized nomenclature and data elements

### VAPD Standardized Nomenclature

| Term                          | Conceptual definition                                                                                                                                                                                   |
|-------------------------------|---------------------------------------------------------------------------------------------------------------------------------------------------------------------------------------------------------|
| VAPD                          | Veterans Affairs Patient Database (how we refer to the database throughout the paper)                                                                                                                   |
| Patient-facility-day          | An individual day that a patient spent in the hospital, defined as calendar date. A patient-facility-day may be associated with multiple hospitalizations if a patient is transferred between hospitals |
| Patient                       | The term used to indicate the individual person (as opposed to participant, subject, Veteran, etc.)                                                                                                     |
| Hospital                      | The physical place (site or facility) where the patient was treated                                                                                                                                     |
| SSH                           | Single-site Hospitalization                                                                                                                                                                             |
| ICU                           | Intensive Care Unit                                                                                                                                                                                     |
| Laboratory                    | The physical lab (site) where the testing machines exist                                                                                                                                                |
| Laboratory test               | The concept of the test conducted by a laboratory (e.g. albumin, bilirubin). There may be various names and clinical synonyms for an individual lab test                                                |
| Facility laboratory test name | The name used to identify a lab test at a specific site (e.g. white blood cell count, WBC)                                                                                                              |
| Test results                  | The result of a laboratory test                                                                                                                                                                         |
| Laboratory test synonyms      | Other clinical names for the same laboratory test (e.g. blood gas, carbon dioxide both map to the same lab test)                                                                                        |
| Facility laboratory code      | Facility-specific code linked to lab test names (the variable name used in the Corporate Data Warehouse is LabChemTestSID)                                                                              |
| Facility LOINC                | Facility-specific code linked to LOINC codes (the variable name used in the Corporate Data Warehouse is LOINCSID)                                                                                       |
| Bedded stay                   | Any stay in a healthcare facility where a patient is provided a bed, including hospital, nursing facility, mental health facility, or domiciliary for homeless Veterans                                 |
| Specialty stay                | A portion of a bedded stay defined by the treating specialty. Each bedded stay is composed of one or more specialty stays                                                                               |
| Acute specialty stay          | A specialty stay that is for an acute medical condition                                                                                                                                                 |
| Non-acute specialty stay      | A specialty stay that is not for an acute medical condition                                                                                                                                             |
| Hospitalization               | One or more consecutive acute specialty stays                                                                                                                                                           |
| Specialty transfer            | Occurs when a patient's care is transitioned from one treating specialty to another treating specialty                                                                                                  |
| Topography                    | A specific description of an anatomic region of the body where lab specimen was drawn (e.g. arterial blood, plasma, blood, serum)                                                                       |

## Data Elements

| Clinical Data Type            | Concepts                                                                                                                                                                                                                                                                                                                       | Variable Level                        |
|-------------------------------|--------------------------------------------------------------------------------------------------------------------------------------------------------------------------------------------------------------------------------------------------------------------------------------------------------------------------------|---------------------------------------|
| Demographics                  | Age, race, sex                                                                                                                                                                                                                                                                                                                 | Patient                               |
| Laboratory tests              | Daily high/low values for tests ordered: Albumin, bilirubin, creatinine, platelets, potassium, white blood cell count, urea, bicarbonate, sodium, lactate, glucose, hematocrit, hemoglobin, pH, PaCO <sub>2</sub> , & PaO <sub>2</sub>                                                                                         | Patient-facility-day                  |
| Vital signs                   | Respiratory rate, mean arterial blood pressure, heart rate, systolic blood pressure, diastolic blood pressure, core temperature                                                                                                                                                                                                | Patient-facility-day                  |
| Hospital admission            | Admission and discharge dates, length of stay                                                                                                                                                                                                                                                                                  | Hospitalization                       |
| Severity scores               | 30 Elixhauser comorbidities, Inpatient Evaluation Center (IPEC) severity score                                                                                                                                                                                                                                                 | Hospitalization                       |
| ICU admission                 | ICU indicator, ICU length of stay, ICU admission and discharge dates                                                                                                                                                                                                                                                           | Hospitalization, patient-facility-day |
| Discharge disposition         | Discharge to home, transfer to another acute care, death                                                                                                                                                                                                                                                                       | Hospitalization                       |
| Death status                  | Death date as of the end of the calendar year and an indicator for death in the hospital                                                                                                                                                                                                                                       | Patient, hospitalization              |
| Hospital characteristics      | State, region, number of operating beds, number of beds, indicator for teaching hospital, facility level,                                                                                                                                                                                                                      | Hospital                              |
| Diagnoses                     | ICD-9 for primary diagnosis and up to 14 additional diagnoses, the single-level Clinical Classification Software category for primary diagnosis                                                                                                                                                                                | Hospitalization                       |
| Sepsis definitions            | Angus definition of infection, Angus definition of acute organ dysfunction, Angus definition of explicit diagnosis, Angus definition of sepsis, CDC EHR-based sepsis definition                                                                                                                                                | Hospitalization                       |
| Antibiotics                   | Antibiotic name and route (i.e., Penicillin_IV, Amoxicillin_PO) were grouped into multiple antibiotic classes which includes Penicillin, 1 <sup>st</sup> – 4 <sup>th</sup> Generation Cephalosporin, Fluoroquinolone, Antiviral, Antifungal, etc. A complete list and classification of Antibiotics is provided in Appendix D. | Patient-facility-day                  |
| Microbiology                  | Blood culture, other micro labs (e.g., urine, sputum)                                                                                                                                                                                                                                                                          | Patient-facility-day                  |
| Vasoactive drugs              | Norepinephrine, epinephrine, phenylephrine, dopamine, vasopressin                                                                                                                                                                                                                                                              | Patient-facility-day                  |
| Sedative drugs                | Propofol, Ketamine, Midazolam, Lorazepam                                                                                                                                                                                                                                                                                       | Patient-facility-day                  |
| Paralytic drugs               | Cisatracurium, Vecuronium, Etomidate                                                                                                                                                                                                                                                                                           | Patient-facility-day                  |
| Analgesic drugs               | Fentanyl, Morphine, Hydromorphone (Dilaudid)                                                                                                                                                                                                                                                                                   | Patient-facility-day                  |
| Other drugs                   | Lactulose, Rifaximin                                                                                                                                                                                                                                                                                                           | Patient-facility-day                  |
| Prior hospitalization history | Number of hospitalizations for the patient in the prior calendar year                                                                                                                                                                                                                                                          | Hospitalization                       |
| Readmissions                  | Date of readmitting hospitalizations in 30 and/or 90 days, diagnosis type of readmitting hospitalizations                                                                                                                                                                                                                      | Hospitalization                       |

## Appendix B: Standard operating procedure for laboratory data extraction

**Goal:** Identify labs drawn for a patient during an inpatient stay on a day-by-day basis. This SOP provides step-by-step instructions on how to extract pharmacy data from the Corporate Data Warehouse (CDW). Medications of interest are extracted annually by calendar year.

### Data Organization:

- CDW: Data stored in the Corporate Data Warehouse are organized as relational tables. Data are separated into multiple domains (such as vital signs, laboratory, inpatient, outpatient, etc.) and tables within each domain. Linking keys (ending in 'SID') are used to reassemble data elements of interest to create tables for analysis.
- Dimension (Dim) tables: Supporting tables which hold meta data. For example, the inpatient diagnosis tables would contain a key for a diagnosis code and the diagnosis dim table would provide the actual diagnosis code value.
- LabChem Domain: Domain containing laboratory tests and results.
- Field: A column of data in a table.
- PatientID: Unique patient ID. Each facility has an ID for a patient (PatientSID) so that a patient seen at multiple facilities would have multiple PatientSIDs but the PatientID is unique at the patient-level.

### LOINC Codes

Regenstrief LOINC Database: <https://loinc.org/>

- LOINC codes are a universal code system for tests, measurements, & observations
- Format: a formal, distinct, and unique 6-part name given to each term for tests/observation identity (e.g. LOINC=66768-3).
- Analyst must create an account first before searching the database, <https://search.loinc.org/searchLOINC/>
- Example: searching "White Blood Cell" will give the following LOINC codes: 66768-3, 12227-5, 61182-2, etc.

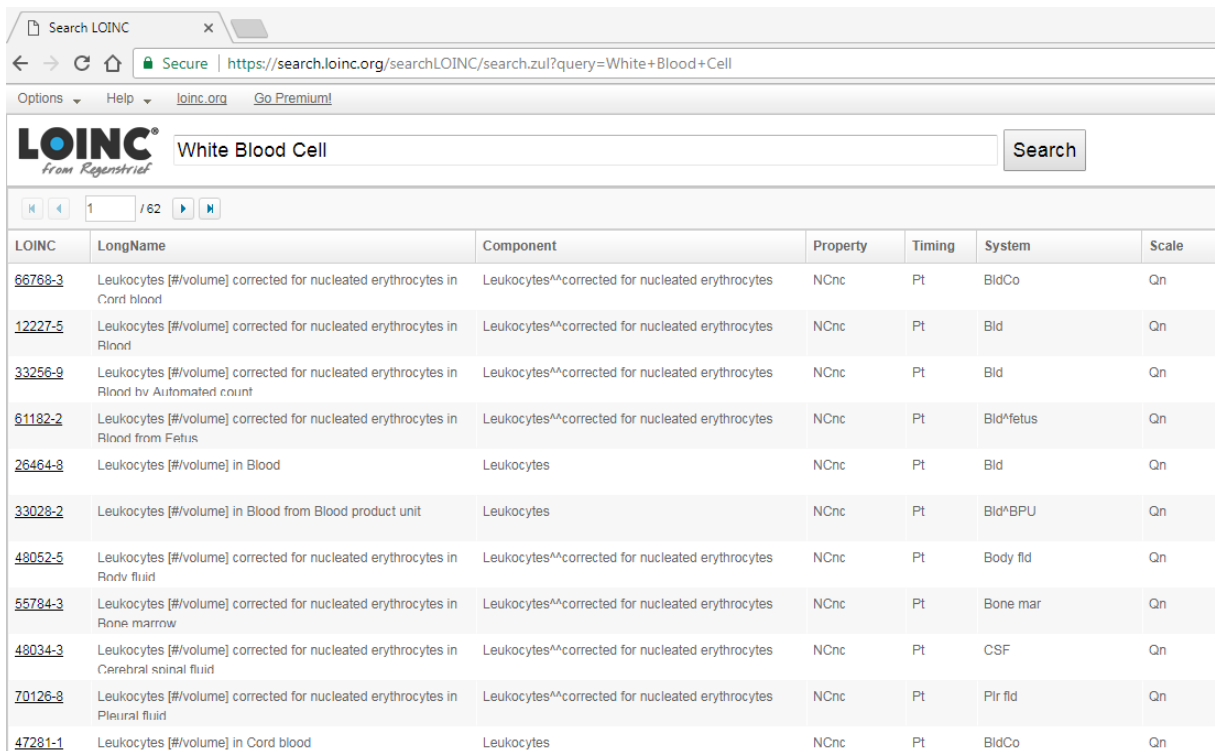

The screenshot shows a web browser window with the URL <https://search.loinc.org/searchLOINC/search.zul?query=White+Blood+Cell>. The search results are displayed in a table with the following columns: LOINC, LongName, Component, Property, Timing, System, and Scale. The results list various LOINC codes for leukocytes in different contexts, such as cord blood, blood, bone marrow, and pleural fluid.

| LOINC                   | LongName                                                                                | Component                                        | Property | Timing | System    | Scale |
|-------------------------|-----------------------------------------------------------------------------------------|--------------------------------------------------|----------|--------|-----------|-------|
| <a href="#">66768-3</a> | Leukocytes [#/#volume] corrected for nucleated erythrocytes in Cord blood               | Leukocytes^^corrected for nucleated erythrocytes | NCnc     | Pt     | BldCo     | Qn    |
| <a href="#">12227-5</a> | Leukocytes [#/#volume] corrected for nucleated erythrocytes in Blood                    | Leukocytes^^corrected for nucleated erythrocytes | NCnc     | Pt     | Bld       | Qn    |
| <a href="#">33256-9</a> | Leukocytes [#/#volume] corrected for nucleated erythrocytes in Blood by Automated count | Leukocytes^^corrected for nucleated erythrocytes | NCnc     | Pt     | Bld       | Qn    |
| <a href="#">61182-2</a> | Leukocytes [#/#volume] corrected for nucleated erythrocytes in Blood from Fetus         | Leukocytes^^corrected for nucleated erythrocytes | NCnc     | Pt     | Bld^fetus | Qn    |
| <a href="#">26464-8</a> | Leukocytes [#/#volume] in Blood                                                         | Leukocytes                                       | NCnc     | Pt     | Bld       | Qn    |
| <a href="#">33028-2</a> | Leukocytes [#/#volume] in Blood from Blood product unit                                 | Leukocytes                                       | NCnc     | Pt     | Bld^BPU   | Qn    |
| <a href="#">48052-5</a> | Leukocytes [#/#volume] corrected for nucleated erythrocytes in Body fluid               | Leukocytes^^corrected for nucleated erythrocytes | NCnc     | Pt     | Body fld  | Qn    |
| <a href="#">55784-3</a> | Leukocytes [#/#volume] corrected for nucleated erythrocytes in Bone marrow              | Leukocytes^^corrected for nucleated erythrocytes | NCnc     | Pt     | Bone mar  | Qn    |
| <a href="#">48034-3</a> | Leukocytes [#/#volume] corrected for nucleated erythrocytes in Cerebral spinal fluid    | Leukocytes^^corrected for nucleated erythrocytes | NCnc     | Pt     | CSF       | Qn    |
| <a href="#">70126-8</a> | Leukocytes [#/#volume] corrected for nucleated erythrocytes in Pleural fluid            | Leukocytes^^corrected for nucleated erythrocytes | NCnc     | Pt     | Plr fld   | Qn    |
| <a href="#">47281-1</a> | Leukocytes [#/#volume] in Cord blood                                                    | Leukocytes                                       | NCnc     | Pt     | BldCo     | Qn    |

## CDW LOINC & LabChemTest Tables

There are two CDW tables to look up potential labs that are used, to capture as many lab observations as possible:

1. Dim.LOINC: LOINC & LOINCSID
  - Each LOINC can have multiple LOINCSIDs, because each Sta3n (Facility\_ID) has a unique LOINCSID for a LOINC code.
  - Find all LOINCSIDs associated with the given LOINC code.
2. Dim.LabChemTest: LabChemTestName and LabChemTestSID
  - Each LabChemTestName can have multiple LabChemTestSIDs depending on Sta3n.
  - Find all LabChemTestSIDs associated with the given lab name.

### Dim.LOINC

|    | LOINCSID  | Sta3n | LOINCIEN | LOINC   | Component  |
|----|-----------|-------|----------|---------|------------|
| 1  | 800357403 | 678   | 26464    | 26464-8 | LEUKOCYTES |
| 2  | 800306119 | 664   | 26464    | 26464-8 | LEUKOCYTES |
| 3  | 800280289 | 649   | 26464    | 26464-8 | LEUKOCYTES |
| 4  | 800385828 | 691   | 26464    | 26464-8 | LEUKOCYTES |
| 5  | 800243669 | 644   | 26464    | 26464-8 | LEUKOCYTES |
| 6  | 800166165 | 600   | 26464    | 26464-8 | LEUKOCYTES |
| 7  | 800119712 | 593   | 26464    | 26464-8 | LEUKOCYTES |
| 8  | 800090788 | 519   | 26464    | 26464-8 | LEUKOCYTES |
| 9  | 800020476 | 501   | 26464    | 26464-8 | LEUKOCYTES |
| 10 | 800606394 | 531   | 26464    | 26464-8 | LEUKOCYTES |
| 11 | 800523187 | 442   | 26464    | 26464-8 | LEUKOCYTES |
| 12 | 800212414 | 605   | 26464    | 26464-8 | LEUKOCYTES |
| 13 | 800055280 | 504   | 26464    | 26464-8 | LEUKOCYTES |

### Dim.LabChemTest

|    | LabChemTestSID | LabChemTestIEN | Sta3n | LabChemTestName                          | LabChemPrintTestName |
|----|----------------|----------------|-------|------------------------------------------|----------------------|
| 15 | 1000110365     | 7794           | 695   | WHITE BLOOD CELL COUNT (DYNACARE)        | WBC COUNT (DYNA...   |
| 16 | 1200027979     | 1480           | 652   | WHITE BLOOD CELL CT                      | WBC                  |
| 17 | 1400012605     | 151            | 405   | WHITE BLOOD CELL/URINE                   | WBC/HPF              |
| 18 | 800005098      | 1              | 459   | WHITE BLOOD CELLS                        | WBC                  |
| 19 | 800222344      | 6000           | 575   | WHITE BLOOD CELLS                        | WHITE                |
| 20 | 1400581067     | 5783           | 595   | WHITE BLOOD CELLS                        | WBC's                |
| 21 | 1000108537     | 9845           | 636   | WHITE BLOOD CELLS (Million/mL)(UNIV.)*IC | WBC/mL               |
| 22 | 800237765      | 10811          | 691   | WHITE BLOOD CELLS (STOOL)                | WBC-STL              |
| 23 | 1000097335     | 6927           | 671   | WHITE BLOOD CELLS (VCB)(182352)          | WBC SPUTUM           |
| 24 | 800016430      | 6536           | 501   | White Blood Cells (WBC)                  | wbc                  |
| 25 | 1000100494     | 1169           | 740   | WHITE BLOOD CELLS (WBC) STOOL, (008656)  | FEC LEU              |
| 26 | 1200072589     | 1977           | 516   | WHITE BLOOD CELLS Thru 2/12/07           | WBC                  |
| 27 | 1200079886     | 1976           | 516   | White Blood Cells*                       | WBC*                 |

## Defining & Extracting New Labs

### Step 1: Search Regenstrief Institute Website to Identify LOINC Codes

- Get a list of synonyms and names for a given lab from Principle Investigators (PIs) who have clinical knowledge.
  - Example: Arterial Blood Gas or Venous Blood Gas Labs may have any of the following names:
    - PaCO<sub>2</sub>, PaO<sub>2</sub>, PCO<sub>2</sub>, PO<sub>2</sub>, blood gas, oxygen, partial pressure, carbon dioxide
- Search the synonyms & names on the LOINC database, then copy and paste the results to an Excel spreadsheet (one lab synonym/name per sheet by their search keyword).
  - Data cleaning: When using multiple synonyms, be sure to de-duplicate across sheets to reduce hand-arbitration burden. For example, the same LOINC codes might show up in PaCO<sub>2</sub> and blood gas, so keep only the code for PaCO<sub>2</sub> and drop the one for blood gas.
- Identify a list of synonyms and names for a given lab from PIs to exclude:
  - Ask PIs about topography: For example, exclude any LOINC component that contains “cord blood”, “mixed venous”, “capillary”, “airway circuit”. By excluding the incorrect topography, labs will decrease time/burden for PIs.
- Send excel file of LOINC codes and long names for each LOINC code to at least two PIs to individually review which LOINC codes to keep and exclude. The PIs will then return the excel spreadsheet to the analyst with a list of LOINC codes to retain/exclude.
- Analyst makes a list of LOINC codes where PIs disagree and sends to PIs again for consensus.

## Step 2: Identifying Facility Lab Codes (LOINCIDs) & Lab Test Names (LabChemTestIDs)

### LOINCIDs

- Analyst creates a csv file with all the verified LOINC codes for the specific lab from Step 1
  - Be sure to name by date and add the “as of date” column in which consensus occurred between the two PIs for record keeping purposes

|    | A       | B    | C   | D         | E                                                       | F     | G   | H    | I    | J     | K   | L    | M     | N     | O    | P      | Q          | R            | S           | T      | U      | V    | W          |
|----|---------|------|-----|-----------|---------------------------------------------------------|-------|-----|------|------|-------|-----|------|-------|-------|------|--------|------------|--------------|-------------|--------|--------|------|------------|
| 1  | LOINC   | Jack | Liz | consensus | LongName                                                | Com   | Pri | Timi | Syst | Scale | Met | exUC | exUr  | Lform | Rank | SIRank | Class      | ShortNa      | Type        | OrderC | DocSec | Copy | as of date |
| 2  | 11556-8 | 1    | 1   | 1         | Oxygen [Partial pressure] in Blood                      | Oxyg  | PP  | Pt   | Bld  | Qn    |     | mm[  | mm Hg |       | 87   | 87     | CHEM       | pO2 Bld Lab  | Both        |        |        |      | 10/13/2017 |
| 3  | 11557-6 | 1    | 1   | 1         | Carbon dioxide [Partial pressure] in Blood              | Carbc | PP  | Pt   | Bld  | Qn    |     | mm[  | mm Hg |       | 86   | 86     | CHEM       | pCO2 Bl Lab  | Both        |        |        |      | 10/13/2017 |
| 4  | 18767-4 | 1    | 1   | 1         | Blood gas studies (set)                                 | Blood | Cn  | -    | ^Pat | Set   |     |      |       |       |      |        | ATTACH.LAB | Attachment   |             |        |        |      | 10/13/2017 |
| 5  | 19214-6 | 1    | 1   | 1         | Oxygen [Partial pressure] saturation adjusted to 0.5 ii | Oxyg  | PP  | Pt   | BldA | Qn    |     | mm[  | mm Hg |       | .    | .      | CHEM       | pO2 sati Lab | Observation |        |        |      | 10/13/2017 |
| 6  | 19216-1 | 1    | 1   | 1         | Oxygen [Partial pressure] saturation adjusted to 0.5 ii | Oxyg  | PP  | Pt   | BldV | Qn    |     | mm[  | mm Hg |       | .    | .      | CHEM       | pO2 sati Lab | Observation |        |        |      | 10/13/2017 |
| 7  | 19218-7 | 1    | 1   | 1         | Oxygen content in Arterial blood                        | Oxyg  | SC  | Pt   | BldA | Qn    |     | mol/ | mol/L |       | .    | .      | CHEM       | O2 Ct Bl Lab | Observation |        |        |      | 10/13/2017 |
| 8  | 19220-3 | 1    | 1   | 1         | Oxygen content in Venous blood                          | Oxyg  | SC  | Pt   | BldV | Qn    |     | mol/ | mol/L |       | .    | .      | CHEM       | O2 Ct Bl Lab | Observation |        |        |      | 10/13/2017 |
| 9  | 19254-2 | 1    | 1   | 1         | Oxygen [Partial pressure] adjusted to patient's actual  | Oxyg  | PP  | Pt   | Bld  | Qn    |     | mm[  | mm Hg |       | 619  | 619    | CHEM       | pO2 ten Lab  | Observation |        |        |      | 10/13/2017 |
| 10 | 19255-9 | 1    | 1   | 1         | Oxygen [Partial pressure] adjusted to patient's actual  | Oxyg  | PP  | Pt   | BldA | Qn    |     | mm[  | mm Hg |       | .    | .      | CHEM       | pO2 ten Lab  | Observation |        |        |      | 10/13/2017 |
| 11 | 19258-3 | 1    | 1   | 1         | Oxygen [Partial pressure] adjusted to patient's actual  | Oxyg  | PP  | Pt   | BldV | Qn    |     | mm[  | mm Hg |       | .    | .      | CHEM       | pO2 ten Lab  | Observation |        |        |      | 10/13/2017 |

- Additionally, also create a list of LOINC codes that were excluded by PIs. Moving forward for a specific lab pull during a new year, when starting the search.loinc in step 1 again, exclude those LOINC codes that were excluded before to shorten the PIs’ review process.
- Pull these verified LOINC codes from CDW table: dim.loinc → get all the LOINCIDs for that given lab to be used later, and then save the output as a dflt table. (See example SQL code below)

Example SQL code:

```

select LOINC, Component, Sta3n, LOINCID
into #loinc
from [CDWWork].[Dim].[loinc]
where loinc in ('76625-3', '16324-6', '1742-6', '1744-2', '1743-4', '77144-4', '44785-4', '48134-1', '76625-3', '77144-4')
--1040 rows

select * from #loinc

```

### LabChemTestIDs

Next, we need to identify LabChemTestIDs in CDW. We are not able to rely only on LOINCIDs because some data tables that we need are linked to LabChemTestIDs rather than LOINCIDs. Therefore, once a list of LOINCIDs is obtained, in order to see what LabChemTestNames are used for the lab of interest, we need to pull in ALL the labs within the study period using those LOINCIDs. We will later use the PI-verified LabChemTestNames in order to pull the correct labs of interest for patients. LabChemTestNames may be entered inconsistently into CPRS, so it is important to review the list of all LabChemTestNames to ensure that we are pulling the correct labs.

- Pull in all labs using LOINCID, obtaining the LabChemTestNames field from Dim.labchemtest

```

SELECT a.LabChemTestSID, a.PatientSID, a.sta3n, a.LabChemSpecimenDateTime, a.LOINCSID, c.labchemtestname
into #labchemtests
FROM [ORD_██████████].[Src].[Chem_PatientLabChem] AS A
INNER JOIN #loinc b on a.Loincsid=b.Loincsid
LEFT JOIN [CDMWork].[dim].labchemtest as c on a.Labchemtestsid=c.Labchemtestsid
WHERE (a.LabChemSpecimenDateTime >= '20140101' AND a.LabChemSpecimenDateTime < '20180101') /*can change dates*/
and (a.LabChemResultNumericValue is NOT NULL)
--( row(s) affected)

select top (1000) * from #labchemtests

--save above table into dflt table if everything looks ok

select *
into dflt.ATLLabname_20190404_SW /*change name when saving this table*/
from #labchemtests
--(16750027 row(s) affected)

alter table dflt.ATLLabname_20190404_SW /*copy and paste table name here: dflt.TableName or temp.tablename*/
rebuild partition=ALL
with
(data_compression=page)

/*export above take into SAS. Make sure to remove duplicates by patientsid, sta3n, LabChemSpecimenDateTime, LOINCSID & labchemtestname
then look at frequency. Anything below N=100 can just delete*/

```

- Export dflt.labname\_date table into SAS dataset for further management
  - Make sure to remove duplicate patient labs
  - Then get a frequency list of LabChemTestNames
    - In general, for labs with thousands of LabChemTestNames, LabChemTestNames with less than 100 occurrences can be deleted. However, this will vary by lab. So confirm with PI regarding the frequencies prior to deleting.
- Copy and paste frequency table to excel -OR- export the table to either CSV or Excel file using SAS code (below)
- Sort the frequency table by LabChemTestNames from greatest to least frequency.
- Download the file onto a VA PC from VINCI using the VINCI download tool in Applications (<https://vaww.vinci.med.va.gov/WebApps/VCFileTransfer/Download>)
- Send list of LabChemTestNames frequency to PIs for review
  - Analyst gives frequency list to at least two PIs to review and decide which LabChemTestNames to keep or exclude.
  - After PIs return their individual lists, analyst makes a list of LabChemTestNames where PIs disagree.
  - Analyst then sends updated list back to PIs again for consensus.
  - Once consensus is found, analyst then creates an excel file of all the LabChemTestNames associated with a given lab exactly as they appear in the CDW Dim.LabChemTest table.
  - Note: In the excel file, make sure to first change LabChemTestNames such as '%NEUTROPHILS (CZ)(Dc'd)' to '%NEUTROPHILS (CZ)(Dc"d)' before saving it as csv file.





## Example SQL code:

```
/*pull ABG loincsid and labchemtestsids from CDW for 2014-2017*/
PROC SQL ;
CREATE TABLE abg_2014_2017 (compress = yes) AS
SELECT a.Sta3n, a.LabChemTestSID, a.PatientSID, a.LabChemSpecimenDateTime, a.LabChemResultNumericValue,
a.TopographySID, a.LOINCSID, a.Units, a.RefHigh, a.RefLow, d.Topography
FROM [INSERT STUDY NAME].[src].[Chem_PatientLabChem] AS A
INNER JOIN ABG_loincsid b on a.Loincsid=b.Loincsid
LEFT JOIN [CDWWork].[Dim].[topography] AS d ON A.TopographySID =D.TopographySID
WHERE a.LabChemSpecimenDateTime >= &startdate. and a.LabChemSpecimenDateTime < &enddate.

UNION

SELECT a.LabChemSID, a.LabSubjectSID, a.Sta3n, a.LabPanelIEN, a.LabPanelSID, a.LongAccessionNumberUID,
a.ShortAccessionNumber,
a.LabChemTestSID, a.PatientSID, a.LabChemSpecimenDateTime, a.LabChemSpecimenDateSID, a.LabChemCompleteDateTime,
a.LabChemCompleteDateSID,
a.LabChemResultValue, a.LabChemResultNumericValue, a.TopographySID, a.LOINCSID, a.Units, a.RefHigh, a.RefLow,
d.Topography
FROM [INSERT STUDY NAME].[src].[Chem_PatientLabChem] a
INNER JOIN ABG_labchemsid b ON a.labchemtestsid=b.labchemtestsid
LEFT JOIN [CDWWork].[Dim].[topography] AS d ON A.TopographySID =D.TopographySID
WHERE loincsid=-1 and
a.LabChemSpecimenDateTime >= &startdate. and a.LabChemSpecimenDateTime < &enddate.

QUIT;

/*remove duplicate labs */
PROC SORT DATA=abg_2014_2017 nodupkey out=abg_mechvent_2014_2017;
BY patientSID sta3n LabChemResultNumericValue LabChemSpecimenDateTime;
RUN;

/*get unique patientcn*/
proc sql;
create table abg_mechvent_2014_2017_V2 (compress=yes) as
select a.*, b.patientcn
from abg_mechvent_2014_2017 a
left join [INSERT STUDY NAME].[src].[CohortCrosswalk] b on a.PatientSID=b.PatientSID ;
QUIT;

/*change patientcn into numeric*/
DATA abg_mechvent_2014_2017_V3 (rename=patientcn2=patientcn compress=yes);
SET abg_mechvent_2014_2017_V2;
patientcn2 = input(patientcn, 10.);
drop patientcn;
LabSpecimenDate=datepart(LabChemSpecimenDateTime); /*convert datetime to date*/
format LabSpecimenDate mmddy10.;
RUN;
```

## Step 4: Look at Frequencies and Descriptive of All Labs

- Examine all lab names, units, topography, and lab result values.
  - Check the percent of missing values for LabChemResultNumericValue.
    - Some missing values for LabChemResultNumericValue are due to the string variable LabChemResultValue, which may contain character values such as '>' and '<' that were coded as missing in the numeric variable (LabChemResultNumericValue). Confirm with PIs the correct way to recode the missing values for LabChemResultNumericValue. Additionally, create a new flag variable (LabChemResultNumericValue\_flag) to indicate the values that were recoded.
  - Standardize the unit formats (create clean\_unit variable) and exclude incorrect ones
    - Make units all capital letters, delete '.' (periods), compress any spaces
    - PI will decide whether to exclude those with unclear or wrong units

- Look at topography and exclude incorrect ones
  - Note that we have compared DefaultTopography and CollectionSample from Dim.CollectionSample table and found that Topography from Dim.Topography has the most complete non-missing information
  - PIs decide which to keep or exclude
- Keep only those with frequencies > 100 (but confirm with PI first if that's still the case before deleting)
- Separate dataset into those with units vs. those without units, and perform the following on both datasets:
  - Aggregate by LabChemTestName, Topography, and clean\_unit:
  - Clean up LabChemTestNames; for example:

```
%let LYMPHOCYTE_AUTO =('LYMPH (AUTO)', 'LYMPH (AUTO)', 'LYMPHS (AUTO)', 'LYMPHOCYTE (AUTO)');
%let LYMPHOCYTE_MANUAL = ('LYMPHS (MANUAL)', 'LYMPHS (MAN)', 'LYMPHSMANUAL', 'LYMPHOCYTE MANUAL');
```

- Investigate normal ranges for lab values: RefHigh and RefLow. Some LabChemTestSIDs have multiple RefHigh and RefLow values. Keep them separate, do not aggregate or deduplicate.
- Calculate the median, 10<sup>th</sup> percentile, 90<sup>th</sup> percentile of RefHigh and RefLow for each aggregated LabChemTestName, Topography, and clean\_unit
- Sort by LabChemTestName, clean\_unit, RefLow, RefHigh
- Send to two PIs to individually review
- Analyst creates list where PIs disagree, and then sends to PIs again to confirm. PIs are trying to ascertain if the specific lab seems plausible for the lab of interest and will flag those that appear clinically unlikely.

|    | A              | B                  | C          | D      | E    | F     | G      | H       | I                        | J       | K     |
|----|----------------|--------------------|------------|--------|------|-------|--------|---------|--------------------------|---------|-------|
| 1  | Topography     | Labchemtestname    | clean_unit | Median | P10  | P90   | RefLow | RefHigh | total_num_agglabchemtest | include | weird |
| 2  | ARTERIAL BLOOD | ABGCTO2            | PERCENT    | 14.9   | 11   | 18.7  | 16     | 21.5    | 273                      | 0       |       |
| 3  | ARTERIAL BLOOD | ABGCTO2            | PERCENT    | 14.4   | 11   | 18.7  | 17.5   | 23      | 8099                     | 0       |       |
| 4  | ARTERIAL BLOOD | ABGFCOHB           | PERCENT    | 1.3    | 0.8  | 2.2   | .      | .       | 8366                     | 0       |       |
| 5  | ARTERIAL BLOOD | ABGFIO2            | PERCENT    | 40     | 21   | 80    | .      | .       | 8271                     | 0       |       |
| 6  | ARTERIAL BLOOD | ABGFO2HB           | PERCENT    | 94.1   | 86.3 | 96.5  | 90     | 95      | 639                      | 1       |       |
| 7  | ARTERIAL BLOOD | ABGPCO2(T)         | MM/HG      | 42.1   | 32.3 | 59.4  | 35     | 45      | 8377                     | 1       |       |
| 8  | ARTERIAL BLOOD | ABGPO2(A/AT)E      | MM/HG      | 71.8   | 27.8 | 241.3 | .      | .       | 539                      | 1       |       |
| 9  | ARTERIAL BLOOD | ABGPO2(A/AT)E      | PERCENT    | 50.55  | 23.5 | 74.5  | .      | .       | 542                      | 0       |       |
| 10 | ARTERIAL BLOOD | ABGPO2(T)          | MM/HG      | 88.9   | 61.8 | 210   | 80     | 100     | 8363                     | 1       |       |
| 11 | ARTERIAL BLOOD | ABGSO2             | PERCENT    | 97.3   | 91.7 | 99.6  | 94     | 100     | 8377                     | 1       |       |
| 12 | ARTERIAL BLOOD | ANCILLARY PCO2     | MM/HG      | 39     | 30.2 | 49.1  | 32     | 46      | 5451                     | 1       |       |
| 19 | BLOOD          | AT PCO2(T)         | MM/HG      | 43.7   | 33   | 58.5  | 35     | 45      | 1171                     | 1       |       |
| 20 | ARTERIAL BLOOD | AT PO2             | MM/HG      | 105    | 65   | 344   | 80     | 105     | 6825                     | 1       |       |
| 21 | BLOOD          | AT PO2             | MM/HG      | 38     | 27   | 120   | 80     | 105     | 1633                     | 1       | 1     |
| 22 | ARTERIAL BLOOD | AT PO2(T)          | MM/HG      | 96     | 64   | 227   | 80     | 105     | 5439                     | 1       |       |
| 23 | BLOOD          | AT PO2(T)          | MM/HG      | 34     | 26   | 57    | 80     | 105     | 1041                     | 1       | 1     |
| 24 | ARTERIAL BLOOD | AT TCO2 (MEASURED) | MMOL/L     | 24     | 22   | 28    | 23     | 27      | 562                      | 0       |       |
| 25 | ARTERIAL BLOOD | AT TCO2 (MEASURED) | MMOL/L     | 26     | 22   | 30    | 24     | 29      | 744                      | 0       |       |
| 26 | BLOOD          | AT TCO2 (MEASURED) | MMOL/L     | 26     | 22   | 31    | 24     | 29      | 1747                     | 0       |       |
| 27 | ARTERIAL BLOOD | AT TCO2 CALCU      | MMOL/L     | 25     | 21   | 32    | 19     | 24      | 2976                     | 0       |       |
| 28 | BLOOD          | AT TCO2 CALCU      | MMOL/L     | 26     | 22   | 31    | 19     | 24      | 819                      | 0       |       |
| 29 | ARTERIAL BLOOD | AT TCO2 CALCU      | MMOL/L     | 25     | 21   | 31    | 23     | 27      | 4362                     | 0       |       |

- Make histograms of those that appear unlikely, so that PIs can re-evaluate if they are plausible for the lab of interest. It depends on a particular test, but some need to be displayed with a bin width of 10.
- For those without units, look at the descriptive statistic and let the PIs decide whether to drop or keep them in.

Example SAS code:

```

/*clean up and standardize units*/
DATA pco_2014_C2; /*2,655,639*/
SET pco_2014_C;
Units2=upcase(units); /*turn all units into uppercase*/
units3=compress(Units2,'); /*removes '!' in units*/
clean_unit=compress(units3); /*removes all blanks (by default - specify options to remove other chars)*/
drop units2 units3;
RUN;

/*Look at Unit and Topography frequencies and PIs help decide which to exclude or keep*/
/*clean/drop units & topography*/
DATA pco_2014_C3;
SET pco_2014_C2;
if clean_unit in ('FAHRENHEIT','L/MIN','LPM','CC/100ML','C','OBS','%CAL','326','DEGREESC','G/DL','MG/DL') then delete;
if topography in ('MIXED VENOUS','URINE','MIXED VENOUS BLOOD','VENOUS BLOOD (MIXED)','PLEURAL FLUID','MIXED
VEN/ART BLD','SWAN-GANZ CATHETER','BILE','FECES','PERITONEAL FLUID') then delete;
if clean_unit='VOL%' or clean_unit='%' or clean_unit='%MEASURED' then clean_unit='PERCENT';
if topography='SERUM-UNK' or topography='serum' then topography='SERUM';
RUN;

/*give each LabChemTestSID and Sta3n a unique count #*/

/*get IQR on non-missing units dataset*/
PROC MEANS DATA=non_missing_unit_C4;
VAR LabChemResultNumericValue;
by Agg_count;
output out=non_missing_unit2(drop=_freq_) min= mean= median= std= max= p10= p90=/ autoname;
RUN;

/*left join descriptives back to original dataset*/
PROC SQL;
CREATE TABLE non_missing_unit3 AS
SELECT A.*, b.LabChemResultNumericVal_Median as Median, b.LabChemResultNumericValue_P10 as P10,
b.LabChemResultNumericValue_P90 as P90
FROM non_missing_unit_C3 A
LEFT JOIN non_missing_unit2 B ON A.Agg_count=B.Agg_count;
QUIT;

/*make a list of those uncertain LabChemTestSIDs, and then only create histograms for those uncertain ones*/
PROC SORT DATA=test;
BY Labchemtestname median;
RUN;

proc sgplot data=test noautolegend;
histogram LabChemResultNumericValue;
by Labchemtestname median;
run;

```

## Step 5: Create daily high and low values for labs

After labs are cleaned based on the above procedures, turn lab values into daily high and low values for each patient-day. This can be saved as a permanent dataset, so that it can be left joined to the VAPD by patient and day variables.

### Example Code:

```

/*create HI & LO values by date*/
PROC SQL;
CREATE TABLE all_ALT_hi_lo_2014_2017 (compress=yes) AS /*17,031,334*/
SELECT *, max(LabChemResultNumericValue) as hi_ALT_daily, min(LabChemResultNumericValue) as lo_ALT_daily
FROM alt2014_2017_20190409_v4
GROUP BY patienticn, LabSpecimenDate
ORDER BY patienticn, LabSpecimenDate;
QUIT;

```

---

```

PROC SORT DATA=all_ALT_hi_lo_2014_2017 nodupkey out=sepsis.ALT_hi_lo_20142017_20190417 ; /*16701006*/
BY patienticn LabSpecimenDate hi_ALT_daily lo_ALT_daily;
RUN;

```

---

## Step 6: Perform Spot Checks

- Data validation is done in VistAWeb or JLV. Request access if not granted already.
- Match verified labs to the cohort of interest (i.e., VAPD).
- Randomly select ~50 patient-facility-days on which a given lab was drawn and ~10 on which the lab was not drawn (in order to ensure that missing labs in CDW were not collected that day).
  - Because the final lab dataset doesn't include specific patient information that are needed to validate on VistAWeb/JLV, additional data processing is needed. On the validation list/file, include:
    - PatientSSN
    - DOB (from VAPD)
    - Facility
    - VISN #
    - DistrictName
    - City
    - Datevalue
    - Admit date
    - Discharge date
    - LabChemSpecimenDateTime
    - Lab variables to fill in the values
  - Have another person on the team (blindly) identify the lab values from that day from CPRS/VistA/JLV (or indicate that lab was not drawn that day), and compare to the extracted CDW lab values. A clinician can have a second look if anything is questionable.

## Example Codes using SAS on vhaannapphsrd3:

1. Merge labs with VAPD or study population
2. Randomly select a cohort to validate
3. Get additional patient info on the cohort to validate, example code below

```

PROC SQL;
CREATE TABLE cohort_crosswalk AS
SELECT distinct PatientSSN, PatientICN, PatientIEN, Sta3n
FROM Src.CohortCrosswalk;
QUIT;

```

```

DATA cohort_crosswalk;
SET cohort_crosswalk;
Patient_ID= input(patienticn, 10.);
RUN;

```

```

/*get SSN*/

```

```

PROC SQL;
CREATE TABLE vistaweb AS
SELECT A.*, B.PatientSSN

```

```
FROM work.validate_cohort A
LEFT JOIN cohort_crosswalk B
ON A.patientid=B.Patient_id and a.sta3n=b.sta3n;
```

**QUIT;**

```
/* get VISN #*/
```

**PROC SQL;**

```
CREATE TABLE vistaweb3 AS
SELECT A.*, B.Facility, b.VISN, b.DistrictName, b.City
FROM vistaweb A
LEFT JOIN dim.vistasite B
ON A.Sta3n=B.Sta3n;
```

**QUIT;**

Use this SAS dataset or export SAS code to vistaweb3 into Excel or CSV format to keep the list in a secure folder.

**For a complete list of lab extractions and cleaning codes, please refer to Github:**

<https://github.com/CCMRcodes/VAPD>

## Appendix C: Standard operating procedure for medications data extraction

**Goal:** Identify medications administered during an inpatient stay on a day-by-day basis. This SOP provides step-by-step instructions on how to extract pharmacy data from Corporate Data Warehouse (CDW). Medications of interest are extracted annually by calendar year.

### Data Organization:

- CDW: Data stored in the Corporate Data Warehouse are organized as relational tables. Data are separated into multiple domains (such as vital signs, laboratory, inpatient, outpatient, etc) and tables within each domain. Linking keys (ending in 'SID') are used to reassemble data elements of interest to create tables for analysis.
- Dimension (Dim) tables: Supporting tables which hold meta data. For example, the Inpatient diagnosis tables would contain a key for a diagnosis code and the diagnosis dim table would provide the actual diagnosis code value.
- Pharmacy Bar Code Medication Administration (BCMA) Domain: Describes the medication administration process in the inpatient setting. Several types of information are available including the dates and time the medication was ordered, delivered and administered to the patient. Details of the medication (name, form, dose, routes of administration, additives and ingredients) are stored in this domain as well.
- PatientICN: Unique patient ID. Each facility has an ID for a patient (PatientSID) so that a patient seen at multiple facilities would have multiple PatientSIDs but the PatientICN is unique at the patient-level.

### Step 1: List of Target Medications

- Principle Investigators generate a list of target medications

### Step 2: Search and Identify All LocalDrugSIDs Associated with Medications of Interest

- Character search medications of interest from all fields containing drug names. For example, using LIKE operator can search for specific pattern or words in a column.
  - WHERE a.LocalDrugNameWithDose like '%PROPOFOL%' finds any values in LocalDrugNameWithDose field that have 'PROPOFOL' in any position.
- Extract the LocalDrugSIDs for all the matching medications from the Dim tables.
- There are three Dim tables containing inpatient medication administration:

#### A. Dim.LocalDrug:

|    | LocalDrugSID | Sta3n | LocalDrugNameWithDose          | VAClassification | NationalDrugSID | DrugClassSID | DrugClass | DrugNameWithoutDoseSID | DrugNameWithoutDose |
|----|--------------|-------|--------------------------------|------------------|-----------------|--------------|-----------|------------------------|---------------------|
| 1  | 350          | 528   | PROPOFOL 10MG/ML INJ 50ML      | CN203            | 244679          | 8187         | CN203     | 42658                  | PROPOFOL            |
| 2  | 686          | 528   | PROPOFOL 10MG/ML INJ 20ML      | CN203            | 244679          | 8187         | CN203     | 42658                  | PROPOFOL            |
| 3  | 3936         | 528   | PROPOFOL 10MG/ML INJ 100ML     | CN203            | 244679          | 8187         | CN203     | 42658                  | PROPOFOL            |
| 4  | 11531        | 528   | ZZPROPOFOL 10 MG/ML INJ 50ML   | CN203            | 244679          | 8187         | CN203     | 42658                  | PROPOFOL            |
| 5  | 18548        | 503   | PROPOFOL 10MG/ML, 20ML AMP     | CN203            | 264865          | 933          | CN203     | 83850                  | PROPOFOL            |
| 6  | 19779        | 506   | PROPOFOL 10MG/ML INJ-50ML      | CN203            | 281227          | 22257        | CN203     | 60352                  | PROPOFOL            |
| 7  | 23622        | 506   | PROPOFOL 10MG/ML INJ-100ML     | CN203            | 281227          | 22257        | CN203     | 60352                  | PROPOFOL            |
| 8  | 27055        | 506   | PROPOFOL 10MG/ML INJ-20ML      | CN203            | 281227          | 22257        | CN203     | 60352                  | PROPOFOL            |
| 9  | 27423        | 637   | ZZPROPOFOL 10MG/ML, 20ML AMP   | CN203            | 301584          | 18923        | CN203     | 48085                  | PROPOFOL            |
| 10 | 29602        | 508   | PROPOFOL 10MG/ML, 50ML VIAL    | CN203            | 312140          | 11773        | CN203     | 76486                  | PROPOFOL            |
| 11 | 29603        | 508   | PROPOFOL 10MG/ML, 100ML VIAL   | CN203            | 312140          | 11773        | CN203     | 76486                  | PROPOFOL            |
| 12 | 31451        | 637   | PROPOFOL 10MG/ML EMULSION/...  | CN203            | 301584          | 18923        | CN203     | 48085                  | PROPOFOL            |
| 13 | 35869        | 508   | PROPOFOL 10MG/ML, 20ML AMP/... | CN203            | 312140          | 11773        | CN203     | 76486                  | PROPOFOL            |

```

/*get all the LocalDrugSIDs associated with list of drugs*/
/*first pull all LocalDrugSIDs*/
PROC SQL;
CREATE TABLE localdrugsid AS
SELECT a.DrugNameWithoutDose, a.LocalDrugNameWithDose, a.NationalDrugNameWithDose, a.NationalDrug, a.Sta3n,
a.LocalDrugSID
FROM Dim.LocalDrug AS A
WHERE a.LocalDrugNameWithDose like '%PROPOFOL%' OR a.DrugNameWithoutDose like '%PROPOFOL%'
OR a.NationalDrug like '%PROPOFOL%' OR a.NationalDrugNameWithDose like '%PROPOFOL%';
QUIT;

```

### B. Dim.IVSolutionIngredient:

|   | IVSolutionIngredientSID | Sta3n | IVSolutionFirstIngredientPrintName | LocalDrugSID | LocalDrugNameWithDose                   | Volume |
|---|-------------------------|-------|------------------------------------|--------------|-----------------------------------------|--------|
| 1 | 800000090               | 436   | PROPOFOL 1000MG/100ML              | 800150320    | PROPOFOL 1000MG IN RTU 100ML            | 100 ML |
| 2 | 800000129               | 442   | PROPOFOL 1000MG/EMULSION           | 800082014    | PROPOFOL 10MG/ML 100ML INJ              | 100 ML |
| 3 | 800000130               | 442   | PROPOFOL 500MG/EMULSION            | 800076476    | PROPOFOL 10MG/ML (DIPRIVAN) 50ML INJ    | 50 ML  |
| 4 | 800000439               | 501   | PROPOFOL 10MG/ML                   | 800105301    | PROPOFOL 10MG/ML INJ 50ML (VI)          | 50 ML  |
| 5 | 800000502               | 504   | PROPOFOL                           | 800142657    | PROPOFOL 10MG/ML INJ, 100ML             | 100 ML |
| 6 | 800000563               | 519   | PROPOFOL 10MG/1ML EMULSION         | 800159387    | PROPOFOL 10MG/ML INFUSION (50ML)        | 50 ML  |
| 7 | 800000588               | 519   | PROPRAL 1% EMULSION 100ML          | 800157032    | PROPOFOL 1% EMULSION FOR INFUSION 100ML | 100 ML |
| 8 | 800000589               | 519   | PROPOFOL 1% EMULSION 100ML         | 800157032    | PROPOFOL 1% EMULSION FOR INFUSION 100ML | 100 ML |
| 9 | 800000598               | 519   | PROPOFOL 10MG/ML                   | 800212767    | PROPOFOL 10MG/ML 20ML INFUSION          | 20 ML  |

```

/*[Dim].[IVSolutionIngredient]*/
PROC SQL;
CREATE TABLE IVSolutionIngredient AS
SELECT a.IVSolutionIngredientSID, a.LocalDrugNameWithDose, a.Sta3n, a.LocalDrugSID, a.Volume,
a.IVSolutionFirstIngredientPrintName
FROM Dim.IVSolutionIngredient AS A
WHERE a.LocalDrugNameWithDose like '%PROPOFOL%' or a.IVSolutionFirstIngredientPrintName like '%PROPOFOL%';
QUIT;

```

### C. Dim.IVAdditiveIngredient:

|   | IVAdditiveIngredientSID | Sta3n | IVAdditiveIngredientPrintName | LocalDrugSID | LocalDrugNameWithDose                 | DrugUnit |
|---|-------------------------|-------|-------------------------------|--------------|---------------------------------------|----------|
| 1 | 800000152               | 504   | PROPOFOL                      | 800142657    | PROPOFOL 10MG/ML INJ, 100ML           | ML       |
| 2 | 800000583               | 600   | z-PROPOFOL                    | 800174587    | PROPOFOL 10MG/ML 50ML VI              | ML       |
| 3 | 800000867               | 653   | PROPOFOL                      | 800046532    | PROPOFOL 10MG/ML INJ 20ML             | MG       |
| 4 | 800001057               | 501   | PROPOFOL                      | 800109038    | PROPOFOL 10MG/ML INJ 100ML (VI)       | MG       |
| 5 | 800001646               | 691   | PROPOFOL                      | 800087744    | PROPOFOL 10MG/ML INJ VIAL 20ML        | MG       |
| 6 | 800002292               | 648   | PROPOFOL**                    | 800026064    | PROPOFOL 10MG/ML INJ 100ML            | MG       |
| 7 | 800002308               | 678   | PROPOFOL                      | 833780       | PROPOFOL 10 MG/ML INJ. 50 ML RTU VIAL | MG       |
| 8 | 800004108               | 570   | PROPOFOL                      | 800066862    | PROPOFOL 10MG/ML (20ML) INJ.EMULSION  | MG       |

```

/*[Dim].[IVAdditiveIngredient]*/
PROC SQL;
CREATE TABLE IVAdditiveIngredient AS
SELECT a.IVAdditiveIngredientSID, a.LocalDrugNameWithDose, a.Sta3n, a.LocalDrugSID, a.DrugUnit,
a.IVAdditiveIngredientPrintName
FROM Dim.IVAdditiveIngredient AS A
WHERE a.LocalDrugNameWithDose like '%PROPOFOL%' or a.IVAdditiveIngredientPrintName like '%PROPOFOL%';
QUIT;

```

### Step 3: Remove Duplicate LocalDrugSIDs, Screen Exclusions, & Create Drug\_name Field

- Combine all data extractions from the three Dim tables, remove duplicate LocalDrugSIDs.
- Screen drug names to exclude any medications with word “research” and/or “study”.
- Label each LocalDrugSID as a medication indicator fields.

```

/*label LocalDrugSIDs with drug_name field*/
PROC SQL;
CREATE TABLE pharm3 AS
SELECT *,
       case when LocalDrugNameWithDose like '%PROPOFOL%' or LocalDrugNameWithDose like 'PROPOFOL%' or
              LocalDrugNameWithDose like 'ZZ DIPRIVAN%' or LocalDrugNameWithDose like 'DIPRIVAN%' then 'PROPOFOL'
              END AS drug_name
FROM all_undup_localdrugsids_table
QUIT;

```

#### Step 4: Extract Medication Administrations Data from Inpatient BCMA Tables

- To identify date and time for each medication administration to specific patients.

For each BCMA Table:

Src.BCMA\_BCMADispensedDrug:

|     | BCMADispensedDrugSID | BCMAMedicationLogSID | Sta3n | ActionDateTime | LocalDrugSID |
|-----|----------------------|----------------------|-------|----------------|--------------|
| 634 | 1000000409547        | 1000000419095        | 556   |                | 662440       |
| 635 | 1000000409548        | 1000000419096        | 556   |                | 661935       |
| 636 | 1000000409548        | 1000000419096        | 556   |                | 661935       |
| 637 | 1000000409549        | 1000000419097        | 556   |                | 662445       |
| 638 | 1000000409549        | 1000000419097        | 556   |                | 662445       |
| 639 | 1000000409550        | 1000000419098        | 556   |                | 661889       |
| 640 | 1000000409550        | 1000000419098        | 556   |                | 661889       |
| 641 | 1000000409551        | 1000000419099        | 556   |                | 660393       |

- Only select the LocalDrugSIDs in step 3, after removing the duplicates.

```

/*pull BCMA_pharm tables*/
/*get 2014 BCMA_BCMADispensedDrug*/
PROC SQL;
create table BCMADispensedDrug as
SELECT a.*
FROM Src.BCMA_BCMADispensedDrug as A
where a.ActionDateTime >= '2014-01-01' and a.ActionDateTime <='2014-12-31'
and A.LocalDrugSID IN (SELECT LocalDrugSID FROM pharm3);
/*only select those localdrugsids*/
quit;

/*get drug_name field that was created*/
PROC SQL;
CREATE TABLE BCMADispensedDrug_3 AS
SELECT A.*, B.drug_name
FROM BCMADispensedDrug A
LEFT JOIN pharm3 B
ON A.LocalDrugSID=B.LocalDrugSID;
QUIT;

```



Src.BCMA\_BCMASolution:

|   | BCMASolutionSID | BCMAMedicationLogSID | Sta3n | ActionDateTime | IVSolutionIngredientSID |
|---|-----------------|----------------------|-------|----------------|-------------------------|
| 1 | 1200000219505   | 1200058143199        | 516   |                | 1200006225              |
| 2 | 1200000219505   | 1200058143199        | 516   |                | 1200006225              |
| 3 | 1200000219506   | 1200058143200        | 516   |                | 1200006226              |
| 4 | 1200000219506   | 1200058143200        | 516   |                | 1200006226              |
| 5 | 1200000219566   | 1200058143261        | 516   |                | 1200006225              |
| 6 | 1200000219566   | 1200058143261        | 516   |                | 1200006225              |
| 7 | 1200000219627   | 1200058143354        | 516   |                | 1200004714              |
| 8 | 1200000219705   | 1200058143466        | 516   |                | 1200006225              |

- Only select the IVSolutionIngredientSIDs in step 2B.
- Link IVSolutionIngredientsSIDs with LocalDrugSIDs to get drug\_name field.

```
/*get BBCMA_BCMASolution*/  
PROC SQL;  
create table temp.BCMA_Solution as  
SELECT a.*  
FROM Src.BCMA_BCMASolution as A  
where a.ActionDateTime >= '2014-01-01' and a.ActionDateTime <='2014-12-31' and IVSolutionIngredientSID IN (SELECT  
IVSolutionIngredientSID FROM IVSolutionIngredient);  
QUIT;
```

```
PROC SQL; /*get LocalDrugSID*/  
CREATE TABLE BCMA_Solution3 AS  
SELECT A.*, b.LocalDrugSID  
FROM BCMA_Solution A  
LEFT JOIN IVSolutionIngredient B  
ON A.IVSolutionIngredientSID=B.IVSolutionIngredientSID;  
QUIT;
```

```
PROC SQL; /*get drug_name*/  
CREATE TABLE BCMA_Solution4 AS  
SELECT A.*, b.drug_name  
FROM BCMA_Solution3 A  
LEFT JOIN pharm3 B  
ON A.LocalDrugSID=B.LocalDrugSID;  
QUIT;
```

Src.BCMA\_BCMAAdditive:

|     | BCMAAdditiveSID | BCMAMedicationLogSID | Sta3n | ActionDateTime | IVAdditiveIngredientSID |
|-----|-----------------|----------------------|-------|----------------|-------------------------|
| 905 | 1200001087250   | 1200002702183        | 581   |                | 1200014828              |
| 906 | 1200001087250   | 1200002702183        | 581   |                | 1200014828              |
| 907 | 1200001087251   | 1200002702207        | 581   |                | 1200014828              |
| 908 | 1200001087251   | 1200002702207        | 581   |                | 1200014828              |
| 909 | 1200001087252   | 1200002702212        | 581   |                | 1200003109              |
| 910 | 1200001087252   | 1200002702212        | 581   |                | 1200003109              |
| 911 | 1200000225068   | 1200058171834        | 516   |                | 1200000393              |

- Only select the IVAdditiveIngredientsSIDs in step 2C.
- Link IVAdditiveIngredientsSIDs with LocalDrugSIDs to get drug\_name field.

```

/*get BBCMA_BCMAAdditive*/
PROC SQL;
create table temp.BCMA_BCMAAdditive as
SELECT a.*
FROM Src.BCMA_BCMAAdditive as A
where a.ActionDateTime >= '2014-01-01' and a.ActionDateTime <='2014-12-31' and IVAdditiveIngredientSID IN (SELECT
IVAdditiveIngredientSID FROM IVAdditiveIngredient);
QUIT;

```

```

PROC SQL; /*get LocalDrugSID*/
CREATE TABLE BCMA_BCMAAdditive3 AS
SELECT A.*, b.LocalDrugSID
FROM BCMA_BCMAAdditive A
LEFT JOIN IVAdditiveIngredient B
ON A.IVAdditiveIngredientSID=B.IVAdditiveIngredientSID;
QUIT;

```

```

PROC SQL; /*get drug_name*/
CREATE TABLE BCMA_BCMAAdditive4 AS
SELECT A.*, b.drug_name
FROM BCMA_BCMAAdditive3 A
LEFT JOIN pharm3 B
ON A.LocalDrugSID=B.LocalDrugSID;
QUIT;

```

- Create action\_date from ActionDateTime for each. EX: ActionDate=datepart(ActionDateTime);
- Get unique patient ID: patienticn.
- Combine the three datasets: BCMA\_BCMAAdditive4, BCMA\_Solution4, and BCMADispensedDrug\_3.

### Step 5: Remove Duplicates and Reformat Dataset

- Remove duplicates by unique patient, drug\_name, and action\_date.
- Transpose data so that each row is a patient-facility-day.

```

/*transpose dataset if needed*/
DATA trans_all_otherdrugs (compress=yes);
SET final.other_drugs;
keep patienticn ActionDate drug_name;
RUN;

```

```

PROC TRANSPOSE DATA=trans_all_otherdrugs OUT=final.trans_all_otherdrugs (DROP=_NAME_) PREFIX=drugname_;
BY patienticn ActionDate;
VAR drug_name;
RUN;

```

### Step 6: Spot Checks

- Randomly select ~50 patient-days of drug delivery and ~10 patient-days of non-delivery to validate in CPRS/VistA. A clinician can have a second look if there are discrepancies.

**For a complete list of inpatient pharmacy extractions and cleaning codes, please refer to Github:**

<https://github.com/CCMRcodes/VAPD>

## Appendix D: Antibiotic drug classifications reference

| Antibiotic_Route           | Variable Name | Label (Abx Class)     |
|----------------------------|---------------|-----------------------|
| Penicillin_IV              | abx1          | penicillin            |
| Amoxicillin_PO             | abx1          | penicillin            |
| Amoxicillin/Clavulanate_PO | abx1          | penicillin            |
| Amoxicillin/Clavulanate_IV | abx1          | penicillin            |
| Ticarcillin/Clavulanate_IV | abx1          | penicillin            |
| Ampicillin/Sulbactam_IV    | abx1          | penicillin            |
| Ampicillin_IV              | abx1          | penicillin            |
| Ampicillin_PO              | abx1          | penicillin            |
| Nafcillin_IV               | abx1          | penicillin            |
| Piperacillin_IV            | abx1          | penicillin            |
| Penicillin_PO              | abx1          | penicillin            |
| Dicloxacillin_IV           | abx1          | penicillin            |
| Dicloxacillin_PO           | abx1          | penicillin            |
| Oxacillin_IV               | abx1          | penicillin            |
| Piperacillin/Tazobactam_IV | abx2          | anti_pseudomonal_pcn  |
| Cefazolin_IV               | abx3          | 1st_gen_cephalosporin |
| Cephalexin_PO              | abx3          | 1st_gen_cephalosporin |
| Cefadroxil_PO              | abx3          | 1st_gen_cephalosporin |
| Cefoxitin_IV               | abx4          | 2nd_gen_cephalosporin |
| Cefuroxime_IV              | abx4          | 2nd_gen_cephalosporin |
| Cefuroxime_PO              | abx4          | 2nd_gen_cephalosporin |
| Cefaclor_PO                | abx4          | 2nd_gen_cephalosporin |
| Cefprozil_PO               | abx4          | 2nd_gen_cephalosporin |
| Cefotetan_IV               | abx4          | 2nd_gen_cephalosporin |
| Cefixime_PO                | abx5          | 3rd_gen_cephalosporin |
| Ceftibuten_PO              | abx5          | 3rd_gen_cephalosporin |
| Ceftriaxone_IV             | abx5          | 3rd_gen_cephalosporin |
| Ceftazidime_IV             | abx5          | 3rd_gen_cephalosporin |
| Cefdinir_PO                | abx5          | 3rd_gen_cephalosporin |
| Cefotaxime_IV              | abx5          | 3rd_gen_cephalosporin |
| Ceftazidime/Avibactam_IV   | abx5          | 3rd_gen_cephalosporin |
| Cefpodoxime_PO             | abx5          | 3rd_gen_cephalosporin |
| Cefepime_IV                | abx6          | 4th_gen_cephalosporin |
| Ofloxacin_PO               | abx7          | fluoroquinolone       |
| Ofloxacin_IV               | abx7          | fluoroquinolone       |
| Ciprofloxacin_IV           | abx7          | fluoroquinolone       |
| Ciprofloxacin_PO           | abx7          | fluoroquinolone       |
| Levofloxacin_IV            | abx7          | fluoroquinolone       |
| Levofloxacin_PO            | abx7          | fluoroquinolone       |
| Moxifloxacin_PO            | abx7          | fluoroquinolone       |
| Moxifloxacin_IV            | abx7          | fluoroquinolone       |
| Norfloxacin_PO             | abx7          | fluoroquinolone       |

|                |      |               |
|----------------|------|---------------|
| Telavancin_IV  | abx8 | Vancomycin_IV |
| Dalbavancin_IV | abx8 | Vancomycin_IV |
| Oritavancin_IV | abx8 | Vancomycin_IV |
| Vancomycin_IV  | abx8 | Vancomycin_IV |

|                |      |               |
|----------------|------|---------------|
| Vancomycin_PO  | abx9 | Vancomycin_PO |
| Fidaxomicin_PO | abx9 | Vancomycin_PO |
| Fidaxomicin_IV | abx9 | Vancomycin_PO |

|                |       |           |
|----------------|-------|-----------|
| Acyclovir_IV   | abx10 | antiviral |
| Acyclovir_PO   | abx10 | antiviral |
| Peramivir_IV   | abx10 | antiviral |
| Ganciclovir_PO | abx10 | antiviral |
| Foscarnet_IV   | abx10 | antiviral |
| Ganciclovir_IV | abx10 | antiviral |

|                 |       |           |
|-----------------|-------|-----------|
| Azithromycin_PO | abx11 | macrolide |
| Azithromycin_IV | abx11 | macrolide |

|                  |       |        |
|------------------|-------|--------|
| Metronidazole_PO | abx12 | flagyl |
| Metronidazole_IV | abx12 | flagyl |

|                                  |       |       |
|----------------------------------|-------|-------|
| Trimethoprim/Sulfamethoxazole_PO | abx13 | sulfa |
| Sulfamethoxazole_IV              | abx13 | sulfa |
| Sulfadiazine_PO                  | abx13 | sulfa |
| Trimethoprim_PO                  | abx13 | sulfa |
| Tetracycline_PO                  | abx13 | sulfa |
| Trimethoprim/Sulfamethoxazole_IV | abx13 | sulfa |

|                   |       |            |
|-------------------|-------|------------|
| Fluconazole_PO    | abx14 | antifungal |
| Fluconazole_IV    | abx14 | antifungal |
| Micafungin_IV     | abx14 | antifungal |
| Voriconazole_PO   | abx14 | antifungal |
| Voriconazole_IV   | abx14 | antifungal |
| Posaconazole_IV   | abx14 | antifungal |
| Posaconazole_PO   | abx14 | antifungal |
| Itraconazole_IV   | abx14 | antifungal |
| Itraconazole_PO   | abx14 | antifungal |
| Amphotericin B_IV | abx14 | antifungal |
| Amphotericin B_PO | abx14 | antifungal |
| Caspofungin_IV    | abx14 | antifungal |
| Anidulafungin_IV  | abx14 | antifungal |

|              |       |              |
|--------------|-------|--------------|
| Aztreonam_IV | abx15 | Aztreonam_IV |
|--------------|-------|--------------|

|                |       |        |
|----------------|-------|--------|
| Clindamycin_IV | abx16 | clinda |
| Clindamycin_PO | abx16 | clinda |

|                                     |       |         |
|-------------------------------------|-------|---------|
| Daptomycin_IV                       | abx17 | big_abx |
| Tigecycline_IV                      | abx17 | big_abx |
| Linezolid_IV                        | abx17 | big_abx |
| Linezolid_PO                        | abx17 | big_abx |
| Ceftaroline_IV                      | abx17 | big_abx |
| Tedizolid_PO                        | abx17 | big_abx |
| Tedizolid_IV                        | abx17 | big_abx |
| Colistin (Colistimethate Sodium)_IV | abx17 | big_abx |
| Colistin (Colistimethate Sodium)_PO | abx17 | big_abx |
| Polymyxin B_IV                      | abx17 | big_abx |
| Ceftaroline_IV                      | abx17 | big_abx |
| Ceftolozane/Tazobactam_IV           | abx17 | big_abx |
| Quinupristin/Dalfopristin_IV        | abx17 | big_abx |

|                 |       |                |
|-----------------|-------|----------------|
| Gentamicin_IV   | abx18 | aminoglycoside |
| Amikacin_IV     | abx18 | aminoglycoside |
| Streptomycin_IV | abx18 | aminoglycoside |
| Tobramycin_PO   | abx18 | aminoglycoside |
| Tobramycin_IV   | abx18 | aminoglycoside |

|                |       |              |
|----------------|-------|--------------|
| Doxycycline_PO | abx19 | tetracycline |
| Doxycycline_IV | abx19 | tetracycline |
| Minocycline_PO | abx19 | tetracycline |
| Minocycline_IV | abx19 | tetracycline |

|                   |       |       |
|-------------------|-------|-------|
| Nitrofurantoin_PO | abx20 | other |
| Fosfomycin_PO     | abx20 | other |
